# Supplementary material for: Emergence and Spread of SARS-CoV-2 Variants of Concern in Canada: a Retrospective Analysis from Clinical and Wastewater Data
Source: bioRxiv or medRxiv preprint supplement (doi:10.1101/2022.12.09.22283256), 2022-12-13

Figure S1 – Number of clinical samples sequenced or screened, by jurisdiction

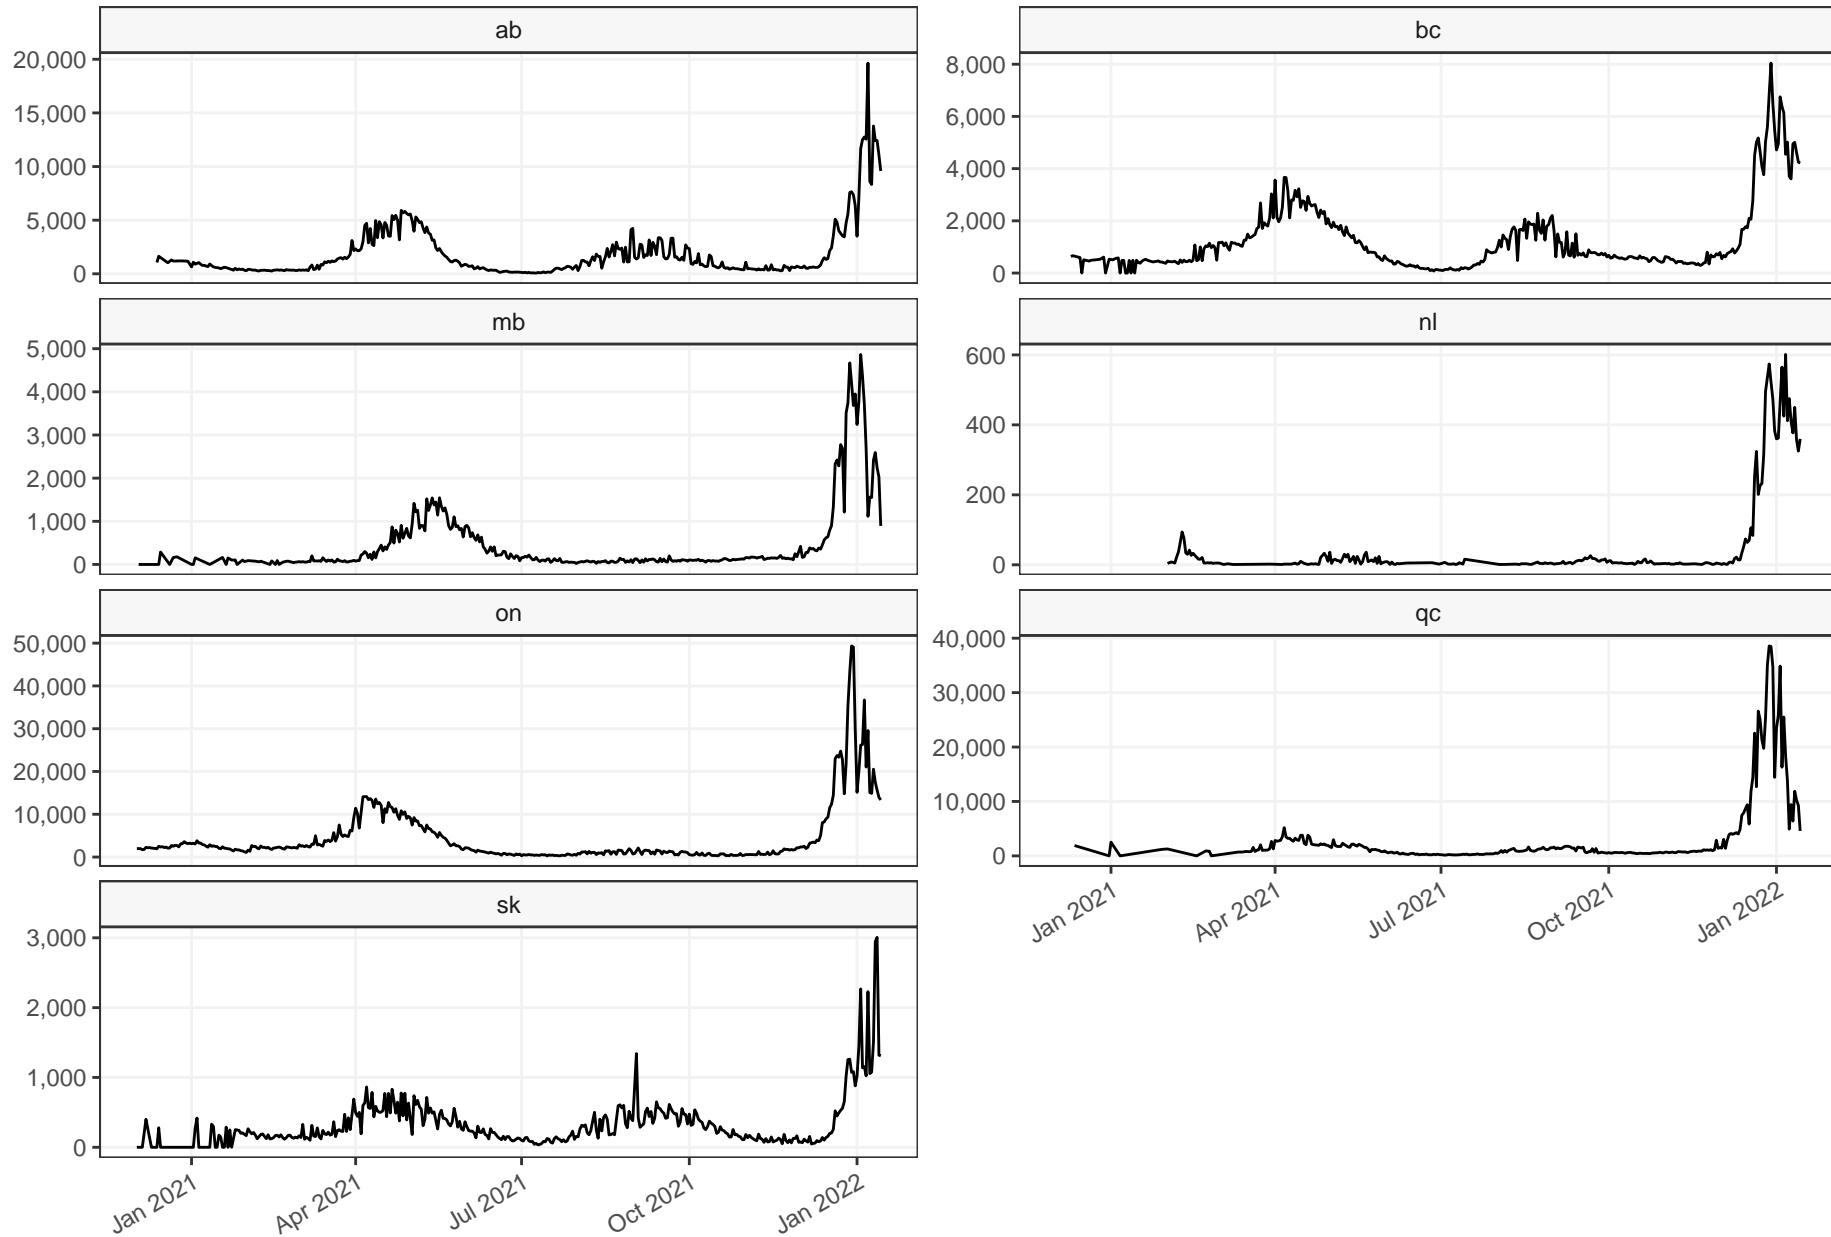

Supplement: Supplementary file [file media-1.pdf]
